# Supplementary material for: Towards improved explosives with a high performance: N-(3,5-dinitro-1H-pyrazol-4-yl)-1H-tetrazol-5-amine and its salts
Source: Royal Society of Chemistry journal article supplement (doi:10.1039/c6ta07740d), 2016-12-08
Supplement: c6ta07740d1.pdf [file c6ta07740d1.pdf]

## Supporting Information

### **Towards improved explosives with a high performance: *N*-(3,5-dinitro-1*H*-pyrazol-4-yl)-1*H*-tetrazol-5-amine and its salts**

Man Zhang,<sup>a</sup> Huiqi Gao,<sup>a</sup> Chuan Li,<sup>a</sup> Wei Fu,<sup>a</sup> Liwei Tang<sup>a</sup> and Zhiming Zhou<sup>\*a,b</sup>

<sup>a</sup>School of Chemical Engineering and the Environment, Beijing Institute of Technology, Beijing, 100081, P.R. China. E-mail: zzm@bit.edu.cn; Tel: +86 10-68918982

<sup>b</sup>State Key Laboratory of Explosion Science and Technology, Beijing, Institute of Technology, Beijing, 100081, P.R. China

#### **Table of contents**

#### **Section 1 Theoretical study**

#### **Section 2 X-ray crystallography**

#### **Section 3 Refernces**

## Section 1. Theoretical study

Calculations were performed using the Gaussian 03 (Revision E.01) suite of programs.<sup>[S1]</sup> The geometric optimization of the structures and frequency analyses were conducted using the B3LYP functional with the 6-31+G\*\* basis set,<sup>[S2]</sup> and single-point energies were calculated at the MP2(full)/6-311++G\*\* level. All of the optimized structures were characterized to be true local energy minima on the potential-energy surface without imaginary frequencies.

Based on the Born-Haber energy cycle (**Figure S1**), the heat of formation of a salt can be simplified according to Equation. (1), where  $\Delta H_L$  is the lattice energy of the salt.

$$\Delta H_f^\circ(\text{ionic salt, 298K}) = \Delta H_f^\circ(\text{cation, 298K}) + \Delta H_f^\circ(\text{anion, 298K}) - \Delta H_L \quad (1)$$

The  $\Delta H_L$  value could be predicted by the formula suggested by Jenkins et al. [Eq. 2],<sup>[S2]</sup> in which  $U_{\text{POT}}$  is the lattice potential energy and  $n_M$  and  $n_X$  depend on the nature of the ions  $M_p^+$  and  $X_q^-$ , respectively, and are equal to three for monatomic ions, five for linear polyatomic ions, and six for nonlinear polyatomic ions.

$$\Delta H_L = U_{\text{POT}} + [p(n_M/2 - 2) + q(n_X/2 - 2)]RT \quad (2)$$

The equation for the lattice potential energy,  $U_{\text{POT}}$ , takes the form of Equation (3), where  $\rho_m$  is the density ( $\text{g cm}^{-3}$ ),  $M_m$  is the chemical formula mass of the ionic material (g), and the coefficients  $\gamma$  ( $\text{kJ mol}^{-1} \text{ cm}$ ) and  $\delta$  ( $\text{kJ mol}^{-1}$ ) are assigned literature values.<sup>[S3]</sup>

$$U_{\text{POT}} (\text{kJ mol}^{-1}) = \gamma (\rho_m/M_m)^{1/3} + \delta \quad (3)$$

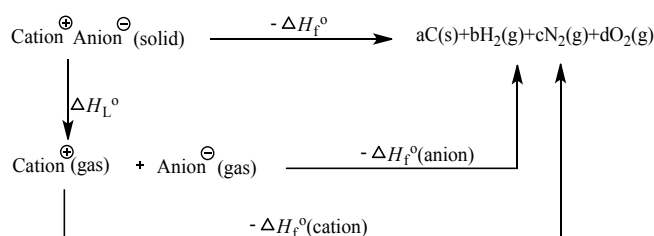

**Figure S1.** Born-Haber cycle for the formation for energetic salts.

The remaining task was the determination of the heats of formation of the compound, which were computed by using the method of isodesmic reactions (**Scheme S1**). The enthalpy

of an isodesmic reaction ( $\Delta H_f^\circ$  298) was obtained by combining the MP2(full)/6-311++G\*\* energy difference for the reaction, the scaled zero-point energies (B3LYP/6-31+G\*\*). The heats of formation of the cations and anions being investigated could then be extracted readily.

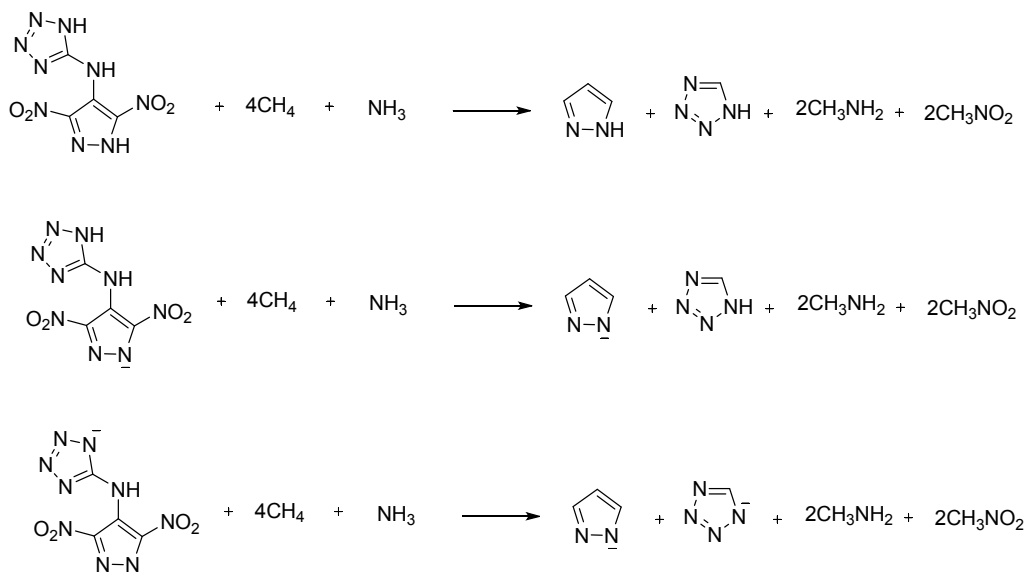

**Scheme S1.** Isodesmic reactions for the calculations of heats of formation.

**Table S1.** Ab Initio computational data, Calculated (B3LYP/6-31+G\*\*//MP2/6-311++G\*\*) Total Energy ( $E_0$ ), Zero Point Energy (ZPE), Values of Thermal correction (HT), and Heats of Formation (HOF) [ $\text{kJ mol}^{-1}$ ] of the compounds.

|  | $E_0$      | ZPE      | $H_T$    | HOF   |
|--|------------|----------|----------|-------|
|  | -945.83964 | 0.120742 | 0.120742 | 856.4 |
|  | -945.35448 | 0.107113 | 0.120891 | 532.7 |

|                                                                                   |              |          |          |       |
|-----------------------------------------------------------------------------------|--------------|----------|----------|-------|
| 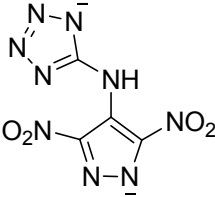 | -944.726997  | 0.093843 | 0.107601 | 674.4 |
|  | -257.7256749 | 0.046855 | 0.00443  | 333.2 |
|  | -257.218829  | 0.033827 | 0.004225 | 170.0 |
|  | -225.7180621 | 0.071265 | 0.004690 | 179.4 |
|  | -225.1444688 | 0.056627 | 0.004552 | 124.2 |
| CH <sub>4</sub>                                                                   | -40.39849    | 0.044791 | 0.003812 | -74.6 |
| NH <sub>3</sub>                                                                   | -56.43462    | 0.034377 | 0.003818 | -45.9 |
| CH <sub>3</sub> NH <sub>2</sub>                                                   | -95.6318759  | 0.064032 | 0.004369 | -23.0 |
| CH <sub>3</sub> NO <sub>2</sub>                                                   | -244.5543604 | 0.049857 | 0.005272 | -74.3 |

## Section 2. X-ray crystallography

Crystals of **6**·H<sub>2</sub>O and **10** was removed from the flask and covered with a layer of hydrocarbon oil. A suitable crystal was then selected, attached to a glass fiber, and placed in the low-temperature nitrogen stream. Data for **6**·H<sub>2</sub>O was collected at 153 K while for **10** were collected at 102.1 K, using a Rigaku Saturn724 CCD (AFC10/Saturn724+ for **7**) diffractometer equipped with a graphite-monochromatized MoK $\alpha$  radiation ( $\lambda = 0.71073$  Å) using omega scans. Data collection and reduction were performed and the unit cell was initially refined by using CrystalClear-SM Expert 2.0 r2 software.<sup>[S4]</sup> The reflection data were also corrected for Lp factors. The structure was solved by direct methods and refined by the least squares method on F2 using the SHELXTL-97 system of programs.<sup>[S5]</sup> Structure were solved in the space group P2<sub>1</sub>/c for **6**·H<sub>2</sub>O, P $\bar{1}$  for **10**,

by analysis of systematic absences. In this all-light-atom structure the value of the Flack parameter did not allow the direction of polar axis to be determined and Friedel reflections were then merged for the final refinement. Bond lengths, angles and dihedral angles of the data collection and refinement are given in **Table S2, S3, S4, S5, S6, S7**.

**Table S2.** Selected bond lengths for salt **6·H<sub>2</sub>O**.

|          | Length/ Å |          | Length/ Å |
|----------|-----------|----------|-----------|
| O1-N3    | 1.247(3)  | N13-C5   | 1.319(4)  |
| O4-N4    | 1.252(3)  | N13-H13A | 0.8800    |
| O2-N3    | 1.229(3)  | N13-H13B | 0.8800    |
| O3-N4    | 1.234(3)  | N12-C5   | 1.323(4)  |
| N10-N11  | 1.418(3)  | N12-H12A | A 0.8800  |
| N10-H10A | 0.8801    | N12-H12B | 0.8800    |
| N10-H10B | 0.8798    | C1-C2    | 1.403(4)  |
| N3-C1    | 1.417(4)  | C2-C3    | 1.409(4)  |
| N7-N8    | 1.317(4)  | O5-H5A   | 0.8399    |
| N7- N6   | 1.347(3)  | O5-H5B   | 0.8401    |
| N2-N1    | 1.332(4)  | N14-N15  | 1.411(4)  |
| N2-C3    | 1.373(4)  | N14-H14A | 0.8667    |
| N1-C1    | 1.356(4)  | N14-H14B | 0.8662    |
| N9-C4    | 1.329(4)  | N17-C6   | 1.324(4)  |
| N9-N8    | 1.351(4)  | N17-H17A | 0.8800    |
| N4-C3    | 1.400(4)  | N17-H17B | 0.8800    |
| N6-C4    | 1.333(4)  | N16-C6   | 1.319(4)  |
| N11-C5   | 1.342(4)  | N16-H16A | 0.8800    |
| N11-H11  | 0.8800    | N16-H16B | 0.8800    |

|       |          |         |          |
|-------|----------|---------|----------|
| N5-C2 | 1.360(4) | N15-C6  | 1.339(4) |
| N5-C4 | 1.394(4) | N15-H15 | 0.8800   |
| N5-H5 | 0.8800   |         |          |

**Table S3.** Bond angles for salt **6·H<sub>2</sub>O**.

|               | Angle/°  |                 | Angle/°  |
|---------------|----------|-----------------|----------|
| N11-N10-H10A  | 103.7    | C2-C1-N3        | 127.5(3) |
| N11-N10-H10B  | 103.1    | N5-C2-C1        | 127.3(3) |
| H10A-N10-H10B | 117.7    | N5-C2-C3        | 132.3(3) |
| O2-N3-O1      | 123.3(3) | C1-C2-C3        | 100.4(2) |
| O2-N3-C1      | 119.2(2) | N9-C4-N6        | 113.1(3) |
| O1-N3-C1      | 117.4(2) | N9-C4-N5        | 122.5(3) |
| N8-N7-N6      | 109.3(2) | N6-C4-N5        | 124.4(3) |
| N1-N2-C3      | 107.6(2) | N13-C5-N12      | 121.0(3) |
| N2-N1-C1      | 107.7(2) | N13-C5-N11      | 120.9(3) |
| C4-N9-N8      | 103.7(2) | N12-C5-N11      | 118.1(3) |
| N7-N8-N9      | 109.8(2) | N2-C3-N4        | 117.9(2) |
| O3-N4-O4      | 121.6(2) | N2-C3-C2        | 111.6(2) |
| O3-N4-C3      | 120.5(2) | N4-C3-C2        | 130.1(3) |
| O4-N4-C3      | 117.9(2) | H5A-O5-H5B      | 98.8     |
| C4-N6-N7      | 104.1(2) | N15-N14-H14A    | 110.2    |
| C5-N11-N10    | 119.1(2) | N15 -N14- H14B  | 109.9    |
| C5-N11-H11    | 120.4    | H14A -N14 -H14B | 108.8    |
| N10-N11-H11   | 120.4    | C6 -N17- H17A   | 120.0    |
| C2-N5-C4      | 125.1(2) | C6 -N17- H17B   | 120.0    |

|               |       |                 |          |
|---------------|-------|-----------------|----------|
| C2-N5-H5      | 118.2 | H17A- N17 -H17B | 120.0    |
| C4-N5-H5      | 114.4 | C6- N16- H16A   | 120.0    |
| C5-N13-H13A   | 120.0 | C6- N16 -H16B   | 120.0    |
| C5-N13-H13B   | 120.0 | H16A- N16- H16B | 120.0    |
| H13A-N13-H13B | 120.0 | C6- N15- N14    | 118.7(2) |
| C5-N12-H12A   | 120.0 | C6- N15 -H15    | 120.6    |
| C5-N12-H12B   | 120.0 | N14 -N15 -H15   | 120.6    |
| H12A-N12-H12B | 120.0 | N16 -C6 -N17    | 121.4(3) |
| N1-C1-C2      | 112.6 | N16 -C6- N15    | 119.4(3) |
| N1-C1-N3      | 119.9 | N17- C6 -N15    | 119.1(3) |

**Table S4.** Torsion angles for salt **6·H<sub>2</sub>O**.

|                | Angle/°   |                   | Angle/°   |
|----------------|-----------|-------------------|-----------|
| C3- N2 -N1 -C1 | 0.5(3)    | N7- N6 -C4 -N9    | -0.2(3)   |
| N6 -N7 -N8- N9 | -1.4(3)   | N7- N6 -C4 -N5    | -176.9(3) |
| C4- N9- N8 -N7 | 1.2(3)    | C2 -N5 -C4- N9    | 154.9(3)  |
| N8-N7- N6- C4  | 1.0(3)    | C2- N5 -C4 -N6    | -28.7(5)  |
| N2-N1- C1 -C2  | -0.2(4)   | N10- N11- C5- N13 | 1.5(5)    |
| N2-N1 -C1- N3  | 179.4(3)  | N10- N11- C5 -N12 | -178.8(3) |
| O2- N3 -C1 -N1 | 11.1(4)   | N1 -N2- C3- N4    | -174.4(3) |
| O1 -N3 -C1-N1  | -168.7(3) | N1 -N2- C3 -C2    | -0.7(3)   |
| O2-N3 -C1- C2  | -169.4(3) | O3- N4 -C3- N2    | 168.8(3)  |
| O1 -N3 -C1- C2 | 10.8(4)   | O4-N4- C3 -N2     | -11.2(4)  |
| C4- N5 -C2- C1 | 147.2(3)  | O3-N4 -C3 -C2     | -3.6(5)   |
| C4 -N5- C2 -C3 | -32.5(5)  | O4-N4- C3- C2     | 176.5(3)  |

|                |           |                  |           |
|----------------|-----------|------------------|-----------|
| N1 -C1- C2- N5 | -180.0(3) | N5- C2 -C3- N2   | -179.7(3) |
| N3- C1-C2- N5  | 0.5(5)    | C1 -C2- C3 -N2   | 0.5(3)    |
| N1- C1 -C2 -C3 | -0.2(3)   | N5- C2 -C3 -N4   | -7.0(6)   |
| N3- C1- C2 -C3 | -179.7(3) | C1-C2- C3 -N4    | 173.2(3)  |
| N8-N9- C4 -N6  | -0.6(3)   | N14 -N15- C6 N16 | 10.8(4)   |
| N8-N9 -C4-N5   | 176.2(3)  | N14 -N15- C6 N17 | -169.7(3) |

**Table S5.** Bond lengths for salt **10**

|       | Length/ Å |         | Length/ Å |
|-------|-----------|---------|-----------|
| N5-C4 | 1.338(2)  | N6-C3   | 1.355(3)  |
| N5-N4 | 1.351(2)  | N3-N4   | 1.294(2)  |
| O4-N9 | 1.241(2)  | C2-C1   | 1.387(3)  |
| N1-C4 | 1.367(3)  | C2-C3   | 1.400(3)  |
| N1-C2 | 1.397(3)  | N9-C3   | 1.424(3)  |
| O3-N9 | 1.237(2)  | N10-N13 | 1.403(2)  |
| O1-N8 | 1.226(2)  | N10-C5  | 1.395(2)  |
| O2-N8 | 1.237(2)  | N10-C6  | 1.352(3)  |
| N8-C1 | 1.431(3)  | N15-C5  | 1.336(3)  |
| N7-N6 | 1.335(2)  | N11-N12 | 1.405(2)  |
| N7-C1 | 1.347(3)  | N11-C6  | 1.321(2)  |
| N2-C4 | 1.321(3)  | N12-C5  | 1.308(3)  |
| N2-N3 | 1.361(2)  | N14-C6  | 1.318(3)  |

**Table S6.** Bond angles for salt **10**

|  | Angle/° |  | Angle/° |
|--|---------|--|---------|
|--|---------|--|---------|



|          |            |            |            |
|----------|------------|------------|------------|
| C4-N5-N4 | 108.11(17) | N3-N4-N5   | 106.41(16) |
| C4-N1-C2 | 123.34(16) | N7-C1-N8   | 119.51(19) |
| O1-N8-O2 | 123.29(18) | N7-C1-C2   | 113.06(18) |
| O1-N8-C1 | 119.42(18) | C2-C1-N8   | 127.42(19) |
| O2-N8-C1 | 117.30(18) | N6-C3-C2   | 111.81(19) |
| N6-N7-C1 | 107.07(18) | N6-C3-N9   | 119.30(18) |
| C4-N2-N3 | 105.32(15) | C2-C3-N9   | 128.9(2)   |
| N5-C4-N1 | 128.0(2)   | C5-N10-N13 | 128.07(18) |
| N2-C4-N5 | 109.06(18) | C6-N10-N13 | 124.20(15) |
| N2-C4-N1 | 122.95(17) | C6-N10-C5  | 107.64(17) |
| N7-N6-C3 | 107.63(16) | C6-N11-N12 | 112.39(18) |
| N4-N3-N2 | 111.08(18) | C5-N12-N11 | 103.65(15) |
| N1-C2-C3 | 130.5(2)   | N15-C5-N10 | 121.25(19) |
| C1-C2-N1 | 129.15(18) | N12-C5-N10 | 110.59(18) |
| C1-C2-C3 | 100.39(19) | N12-C5-N15 | 127.98(17) |
| O4-N9-C3 | 118.11(17) | N11-C6-N10 | 105.71(17) |
| O3-N9-O4 | 123.89(18) | N14-C6-N10 | 126.43(19) |
| O3-N9-C3 | 118.00(19) | N14-C6-N11 | 127.9(2)   |

**Table S7.** Torsion angles for salt **10**

|             | Angle/°    |             | Angle/°    |
|-------------|------------|-------------|------------|
| O4-N9-C3-N6 | 178.52(15) | C2-N1-C4-N5 | -5.0(3)    |
| O4-N9-C3-C2 | -3.6(3)    | C2-N1-C4-N2 | 173.87(18) |
| N1-C2-C1-N8 | -0.1(3)    | N4-N5-C4-N1 | 179.21(19) |
| N1-C2-C1-N7 | 178.73(16) | N4-N5-C4-N2 | 0.2(2)     |

|             |             |                |             |
|-------------|-------------|----------------|-------------|
| N1-C2-C3-N6 | -178.74(17) | C1-N7-N6-C3    | 0.05(18)    |
| N1-C2-C3-N9 | 3.3(3)      | C1-C2-C3-N6    | 1.9(2)      |
| O3-N9-C3-N6 | -1.7(2)     | C1-C2-C3-N9    | -176.11(17) |
| O3-N9-C3-C2 | 176.13(17)  | C3-C2-C1-N8    | 179.31(17)  |
| O1-N8-C1-N7 | -7.4(3)     | C3-C2-C1-N7    | -1.9(2)     |
| O1-N8-C1-C2 | 171.42(18)  | N11-N12-C5-N10 | 0.4(2)      |
| O2-N8-C1-N7 | 172.27(15)  | N11-N12-C5-N15 | -174.70(19) |
| O2-N8-C1-C2 | -9.0(3)     | N12-N11-C6-N10 | -0.9(2)     |
| N7-N6-C3-C2 | -1.3(2)     | N12-N11-C6-N14 | 178.30(19)  |
| N7-N6-C3-N9 | 176.91(15)  | N13-N10-C5-N15 | -8.7(3)     |
| N2-N3-N4-N5 | 1.6(2)      | N13-N10-C5-N12 | 175.81(17)  |
| C4-N5-N4-N3 | -1.1(2)     | N13-N10-C6-N11 | -175.82(16) |
| C4-N1-C2-C1 | -115.9(2)   | N13-N10-C6-N14 | 4.9(3)      |
| C4-N1-C2-C3 | 64.8(3)     | C5-N10-C6-N11  | 1.1(2)      |
| C4-N2-N3-N4 | -1.5(2)     | C5-N10-C6-N14  | -178.11(19) |
| N6-N7-C1-N8 | -179.85(15) | C6-N10-C5-N15  | 174.50(18)  |
| N6-N7-C1-C2 | 1.2(2)      | C6-N10-C5-N12  | -1.0(2)     |
| N3-N2-C4-N5 | 0.8(2)      | C6-N11-N12-C5  | 0.3(2)      |
| N3-N2-C4-N1 | -178.31(17) |                |             |

---

### Section 3 Refernces

[S1] Gaussian 03, Revision E.01, M. J. Frisch, G. W. Trucks, H. B. Schlegel, G. E. Scuseria, M. A. Robb, J. R. Cheeseman, J. A. Montgomery, J. T. Vreven, K. N. Kudin, J. C. Burant, J. M. Millam, S. S. Iyengar, J. Tomasi, V. Barone, B. Mennucci, M. Cossi, G. Scalmani, N. Rega, G. A. Petersson, H. Nakatsuji, M. Hada, M. Ehara, K. Toyota, R. Fukuda, J. Hasegawa, M. Ishida, T. Nakajima, Y. Honda, O. Kitao, H. Nakai, M. Klene, X. Li, J. E. Knox, H. P.

Hratchian, J. B. Cross, V. Bakken, C. Adamo, J. Jaramillo, R. Gomperts, R. E. Stratmann, O. Yazyev, A. J. Austin, R. Cammi, C. Pomelli, J. W. Ochterski, P. Y. Ayala, K. Morokuma, G. A. Voth, P. Salvador, J. J. Dannenberg, V. G. Zakrzewski, S. Dapprich, A. D. Daniels, M. C. Strain, O. Farkas, D. K. Malick, A. D. Rabuck, K. Raghavachari, J. B. Foresman, J. V. Ortiz, Q. Cui, A. G. Baboul, S. Clifford, J. Cioslowski, B. B. Stefanov, G. Liu, A. Liashenko, P. Piskorz, I. Komaromi, R. L. Martin, D. J. Fox, T. Keith, M. A. Al-Laham, C. Y. Peng, A. Nanayakkara, M. Challacombe, P. M. W. Gill, B. Johnson, W. Chen, M. W. Wong, C. Gonzalez, J. A. Pople, Gaussian, Inc., Wallingford CT, **2004**.

[S2] R. G. Parr, W. Yang, *Density Functional Theory of Atoms and Molecules*, Oxford University Press, New York, **1989**.

[S3] H. D. B. Jenkins, D. Tudeal, L. Glasser, *Inorg. Chem.* **2002**, *41*, 2364–2367.

[S4] CrystalClear, SMExpert 2.0 r2, An Integrated Program for the Collection and Processing of Area Detector Data, Rigaku Corporation, **2009**.

[S5] G. M. Sheldrick, SHELXTL-97, Structure Determination Software Suite. Bruker AXS, Madison WI, **2008**.
